# Supplementary material
Source: HighWire-hosted journal article supplement (https://qualitysafety.bmj.com/highwire/filestream/160779/field_highwire_adjunct_files/0/bmjqs-2021-013721supp001_data_supplement.pdf)
Supplement: bmjqs-2021-013721supp001_data_supplement.pdf [file bmjqs-2021-013721supp001_data_supplement.pdf]

Appendix I. Characteristics of inpatients with COVID-19 admitted between March 2020 and February 2021

| Characteristic            | Overall<br>N =<br>38,104 | Mar-Apr<br>N = 4,589 | May-Jun<br>N = 2,742 | Jul-Aug<br>N = 5,403 | Sep-Oct<br>N = 4,733 | Nov-Dec<br>N =<br>12,373 | Jan-Feb<br>N = 8,264 | p-value |
|---------------------------|--------------------------|----------------------|----------------------|----------------------|----------------------|--------------------------|----------------------|---------|
| <b>Race</b>               |                          |                      |                      |                      |                      |                          |                      | <0.001  |
| White                     | 26,692<br>(70%)          | 2,110<br>(46%)       | 1,703<br>(62%)       | 3,639<br>(67%)       | 3,763<br>(80%)       | 9,357<br>(76%)           | 6,120<br>(74%)       |         |
| Black or African American | 8,941<br>(23%)           | 2,197<br>(48%)       | 786 (29%)            | 1,405<br>(26%)       | 700 (15%)            | 2,233<br>(18%)           | 1,620<br>(20%)       |         |
| Other                     | 2,471<br>(6.5%)          | 282<br>(6.1%)        | 253<br>(9.2%)        | 359<br>(6.6%)        | 270<br>(5.7%)        | 783<br>(6.3%)            | 524<br>(6.3%)        |         |
| <b>Age</b>                |                          |                      |                      |                      |                      |                          |                      | <0.001  |
| 18-49                     | 7,167<br>(19%)           | 749 (16%)            | 768 (28%)            | 1,267<br>(23%)       | 863 (18%)            | 2,042<br>(17%)           | 1,478<br>(18%)       |         |
| 50-64                     | 9,758<br>(26%)           | 1,216<br>(26%)       | 725 (26%)            | 1,417<br>(26%)       | 1,172<br>(25%)       | 3,146<br>(25%)           | 2,082<br>(25%)       |         |
| 65-84                     | 16,668<br>(44%)          | 2,033<br>(44%)       | 936 (34%)            | 2,183<br>(40%)       | 2,168<br>(46%)       | 5,706<br>(46%)           | 3,642<br>(44%)       |         |
| 85+                       | 4,511<br>(12%)           | 591 (13%)            | 313 (11%)            | 536<br>(9.9%)        | 530 (11%)            | 1,479<br>(12%)           | 1,062<br>(13%)       |         |
| <b>Age (Median, IQR)</b>  | 67 (54,<br>78)           | 68 (56,<br>78)       | 62 (47,<br>76)       | 65 (51,<br>76)       | 68 (55,<br>78)       | 68 (56,<br>78)           | 67 (55,<br>78)       | <0.001  |
| <b>Sex</b>                |                          |                      |                      |                      |                      |                          |                      | 0.004   |
| Female                    | 18,834<br>(49%)          | 2,329<br>(51%)       | 1,403<br>(51%)       | 2,737<br>(51%)       | 2,353<br>(50%)       | 5,979<br>(48%)           | 4,033<br>(49%)       |         |
| Male                      | 19,270<br>(51%)          | 2,260<br>(49%)       | 1,339<br>(49%)       | 2,666<br>(49%)       | 2,380<br>(50%)       | 6,394<br>(52%)           | 4,231<br>(51%)       |         |
| <b>Insurance</b>          |                          |                      |                      |                      |                      |                          |                      | <0.001  |
| Commercial                | 11,588<br>(30%)          | 1,202<br>(26%)       | 834 (30%)            | 1,749<br>(32%)       | 1,482<br>(31%)       | 3,744<br>(30%)           | 2,577<br>(31%)       |         |
| Medicaid                  | 3,396<br>(8.9%)          | 540 (12%)            | 364 (13%)            | 542 (10%)            | 365<br>(7.7%)        | 912<br>(7.4%)            | 673<br>(8.1%)        |         |
| Medicare                  | 21,692<br>(57%)          | 2,751<br>(60%)       | 1,304<br>(48%)       | 2,846<br>(53%)       | 2,741<br>(58%)       | 7,329<br>(59%)           | 4,721<br>(57%)       |         |
| Other                     | 1,428<br>(3.7%)          | 96 (2.1%)            | 240<br>(8.8%)        | 266<br>(4.9%)        | 145<br>(3.1%)        | 388<br>(3.1%)            | 293<br>(3.5%)        |         |
| <b>Comorbidity</b>        |                          |                      |                      |                      |                      |                          |                      |         |
| Obesity                   | 13,200<br>(35%)          | 1,913<br>(42%)       | 841 (31%)            | 1,730<br>(32%)       | 1,603<br>(34%)       | 4,449<br>(36%)           | 2,664<br>(32%)       | <0.001  |
| Asthma                    | 3,121<br>(8.2%)          | 424<br>(9.2%)        | 200<br>(7.3%)        | 444<br>(8.2%)        | 379<br>(8.0%)        | 1,042<br>(8.4%)          | 632<br>(7.6%)        | 0.016   |

|                                        |                   |                   |                   |                   |                   |                   |                   |        |
|----------------------------------------|-------------------|-------------------|-------------------|-------------------|-------------------|-------------------|-------------------|--------|
| Chronic obstructive pulmonary disease  | 5,565 (15%)       | 795 (17%)         | 363 (13%)         | 748 (14%)         | 716 (15%)         | 1,846 (15%)       | 1,097 (13%)       | <0.001 |
| Diabetes                               | 15,947 (42%)      | 1,969 (43%)       | 1,137 (41%)       | 2,273 (42%)       | 1,874 (40%)       | 5,214 (42%)       | 3,480 (42%)       | 0.024  |
| Hypertension                           | 16,142 (42%)      | 1,948 (42%)       | 1,077 (39%)       | 2,279 (42%)       | 2,022 (43%)       | 5,274 (43%)       | 3,542 (43%)       | 0.032  |
| Heart failure                          | 6,956 (18%)       | 914 (20%)         | 486 (18%)         | 870 (16%)         | 865 (18%)         | 2,318 (19%)       | 1,503 (18%)       | <0.001 |
| Chronic Ischemic Heart disease         | 8,462 (22%)       | 997 (22%)         | 505 (18%)         | 1,093 (20%)       | 1,105 (23%)       | 2,903 (23%)       | 1,859 (22%)       | <0.001 |
| Chronic kidney disease                 | 8,540 (22%)       | 1,270 (28%)       | 617 (23%)         | 1,139 (21%)       | 971 (21%)         | 2,779 (22%)       | 1,764 (21%)       | <0.001 |
| Liver disease                          | 2,263 (5.9%)      | 286 (6.2%)        | 200 (7.3%)        | 304 (5.6%)        | 274 (5.8%)        | 698 (5.6%)        | 501 (6.1%)        | 0.023  |
| Neoplasms                              | 2,467 (6.5%)      | 284 (6.2%)        | 160 (5.8%)        | 303 (5.6%)        | 289 (6.1%)        | 889 (7.2%)        | 542 (6.6%)        | <0.001 |
| Transplant                             | 244 (0.6%)        | 25 (0.5%)         | 10 (0.4%)         | 31 (0.6%)         | 38 (0.8%)         | 78 (0.6%)         | 62 (0.8%)         | 0.2    |
| ECI                                    | 9 (0, 17)         | 11 (4, 20)        | 9 (0, 17)         | 8 (0, 16)         | 8 (0, 16)         | 8 (0, 17)         | 8 (0,16)          | <0.001 |
| <b>Social Vulnerability Index</b>      |                   |                   |                   |                   |                   |                   |                   | <0.001 |
| Low                                    | 5,417 (14%)       | 953 (21%)         | 332 (12%)         | 441 (8.2%)        | 683 (14%)         | 1,903 (15%)       | 1,105 (13%)       |        |
| Mid-Low                                | 11,905 (31%)      | 1,275 (28%)       | 992 (36%)         | 1,924 (36%)       | 1,419 (30%)       | 3,635 (29%)       | 2,660 (32%)       |        |
| Mid-High                               | 12,602 (33%)      | 749 (16%)         | 805 (29%)         | 1,920 (36%)       | 1,742 (37%)       | 4,504 (36%)       | 2,882 (35%)       |        |
| High                                   | 8,180 (21%)       | 1,612 (35%)       | 613 (22%)         | 1,118 (21%)       | 889 (19%)         | 2,331 (19%)       | 1,617 (20%)       |        |
| <b>Vital Signs</b>                     |                   |                   |                   |                   |                   |                   |                   |        |
| Respiratory rate ≥24 breaths / min     | 8,055 (21%)       | 1,173 (26%)       | 539 (20%)         | 1,103 (20%)       | 871 (18%)         | 2,604 (21%)       | 1,765 (21%)       | <0.001 |
| Oxygen saturation < 94%                | 12,734 (33%)      | 1,460 (32%)       | 722 (26%)         | 1,666 (31%)       | 1,505 (32%)       | 4,396 (36%)       | 2,985 (36%)       | <0.001 |
| Temperature ≥ 38°C                     | 5,086 (13%)       | 953 (21%)         | 436 (16%)         | 807 (15%)         | 570 (12%)         | 1,474 (12%)       | 846 (10%)         | <0.001 |
| ICU admission                          | 16,756 (44%)      | 1,933 (42%)       | 1,204 (44%)       | 2,357 (44%)       | 2,194 (46%)       | 5,533 (45%)       | 3,535 (43%)       | <0.001 |
| COVID-19 hospital prevalence (average) | 0.16 (0.10, 0.24) | 0.27 (0.09, 0.43) | 0.07 (0.04, 0.13) | 0.13 (0.07, 0.20) | 0.09 (0.06, 0.13) | 0.19 (0.15, 0.26) | 0.19 (0.12, 0.24) | <0.001 |
| COVID-19 hospital prevalence           |                   |                   |                   |                   |                   |                   |                   | <0.001 |

|               |                 |                |                |                |                |                |                |  |
|---------------|-----------------|----------------|----------------|----------------|----------------|----------------|----------------|--|
| Low (<10%)    | 9,027<br>(24%)  | 1,214<br>(26%) | 1,767<br>(64%) | 1,867<br>(35%) | 2,394<br>(51%) | 487<br>(3.9%)  | 1,298<br>(16%) |  |
| Mid (10%-25%) | 20,265<br>(53%) | 1,020<br>(22%) | 744 (27%)      | 2,603<br>(48%) | 2,242<br>(47%) | 8,559<br>(69%) | 5,097<br>(62%) |  |
| High (>25%)   | 8,812<br>(23%)  | 2,355<br>(51%) | 231<br>(8.4%)  | 933 (17%)      | 97 (2.0%)      | 3,327<br>(27%) | 1,869<br>(23%) |  |

Appendix II. Adjusted odds ratios (AOR) of in-hospital mortality among patients with COVID-19 admitted between May 2020 and February 2021

| Characteristic            | All hospitalized patients (N = 33,515) |            |         | Patients with an ICU stay (N = 14,823) |            |         |
|---------------------------|----------------------------------------|------------|---------|----------------------------------------|------------|---------|
|                           | AOR                                    | 95% CI     | p-value | AOR                                    | 95% CI     | p-value |
| <b>Month admitted</b>     |                                        |            |         |                                        |            |         |
| May-Jun                   | Ref                                    | Ref        | Ref     | Ref                                    | Ref        | Ref     |
| Jul-Aug                   | 1.02                                   | 0.86, 1.21 | 0.8     | 1.13                                   | 0.93, 1.37 | 0.2     |
| Sep-Oct                   | 1.08                                   | 0.91, 1.29 | 0.4     | 1.16                                   | 0.95, 1.42 | 0.15    |
| Nov-Dec                   | 1.15                                   | 0.97, 1.36 | 0.12    | 1.32                                   | 1.09, 1.61 | 0.005   |
| Jan-Feb                   | 0.9                                    | 0.76, 1.07 | 0.2     | 1.06                                   | 0.87, 1.29 | 0.6     |
| <b>Race</b>               |                                        |            |         |                                        |            |         |
| White                     | Ref                                    | Ref        | Ref     | Ref                                    | Ref        | Ref     |
| Black or African American | 0.94                                   | 0.85, 1.05 | 0.3     | 1.06                                   | 0.93, 1.20 | 0.4     |
| Other                     | 1.37                                   | 1.18, 1.58 | <0.001  | 1.41                                   | 1.19, 1.67 | <0.001  |
| <b>Age (standardized)</b> | 1.86                                   | 1.75, 1.98 | <0.001  | 1.76                                   | 1.65, 1.89 | <0.001  |
| <b>Sex</b>                |                                        |            |         |                                        |            |         |
| Female                    | Ref                                    | Ref        | Ref     | Ref                                    | Ref        | Ref     |
| Male                      | 1.24                                   | 1.15, 1.34 | <0.001  | 1.21                                   | 1.11, 1.32 | <0.001  |
| <b>Insurance</b>          |                                        |            |         |                                        |            |         |
| Commercial                | Ref                                    | Ref        | Ref     | Ref                                    | Ref        | Ref     |
| Medicaid                  | 1.13                                   | 0.94, 1.36 | 0.2     | 1.19                                   | 0.97, 1.46 | 0.087   |
| Medicare                  | 1.14                                   | 1.02, 1.27 | 0.021   | 1.22                                   | 1.07, 1.38 | 0.002   |
| Other                     | 0.95                                   | 0.73, 1.24 | 0.7     | 0.98                                   | 0.73, 1.32 | 0.9     |
| <b>Comorbidity</b>        |                                        |            |         |                                        |            |         |
| Obesity                   | 2.03                                   | 1.86, 2.21 | <0.001  | 1.88                                   | 1.70, 2.08 | <0.001  |
| Asthma                    | 0.75                                   | 0.64, 0.88 | <0.001  | 0.63                                   | 0.53, 0.74 | <0.001  |
| Chronic obstructive       | 0.87                                   | 0.79, 0.96 | 0.005   | 0.65                                   | 0.59, 0.73 | <0.001  |

|                                                    |      |            |        |      |            |        |
|----------------------------------------------------|------|------------|--------|------|------------|--------|
| pulmonary disease                                  |      |            |        |      |            |        |
| Diabetes                                           | 1.48 | 1.37, 1.60 | <0.001 | 1.4  | 1.28, 1.53 | <0.001 |
| Hypertension                                       | 0.89 | 0.81, 0.98 | 0.023  | 0.93 | 0.83, 1.04 | 0.2    |
| Heart failure                                      | 0.55 | 0.50, 0.61 | <0.001 | 0.54 | 0.48, 0.61 | <0.001 |
| Chronic Ischemic Heart Disease                     | 1.12 | 1.03, 1.23 | 0.007  | 1.1  | 0.99, 1.22 | 0.065  |
| Chronic kidney disease                             | 0.83 | 0.75, 0.92 | <0.001 | 0.93 | 0.82, 1.04 | 0.2    |
| Liver disease                                      | 1.72 | 1.52, 1.96 | <0.001 | 1.72 | 1.48, 2.00 | <0.001 |
| Neoplasms                                          | 0.64 | 0.56, 0.74 | <0.001 | 0.74 | 0.62, 0.87 | <0.001 |
| Transplant                                         | 1.2  | 0.79, 1.82 | 0.4    | 1.38 | 0.85, 2.23 | 0.2    |
| <b>Elixhauser Comorbidity Index (standardized)</b> |      |            |        |      |            |        |
|                                                    | 2.52 | 2.41, 2.64 | <0.001 | 2.18 | 2.06, 2.31 | <0.001 |
| <b>Social Vulnerability Index</b>                  |      |            |        |      |            |        |
| Low                                                | Ref  | Ref        | Ref    | Ref  | Ref        | Ref    |
| Mid-Low                                            | 0.95 | 0.82, 1.10 | 0.5    | 0.91 | 0.76, 1.08 | 0.3    |
| Mid-High                                           | 0.92 | 0.80, 1.07 | 0.3    | 0.86 | 0.72, 1.02 | 0.088  |
| High                                               | 1.15 | 0.99, 1.35 | 0.074  | 1.03 | 0.85, 1.24 | 0.8    |
| <b>Vital signs</b>                                 |      |            |        |      |            |        |
| Respiratory rate $\geq$ 24 breaths / min           | 2.21 | 2.04, 2.40 | <0.001 | 1.58 | 1.44, 1.73 | <0.001 |
| Oxygen saturation < 94%                            | 1.82 | 1.69, 1.96 | <0.001 | 1.58 | 1.45, 1.73 | <0.001 |
| Temperature $\geq$ 38°C                            | 1.03 | 0.93, 1.15 | 0.6    | 1.11 | 0.98, 1.26 | 0.1    |
| <b>COVID-19 hospital prevalence</b>                |      |            |        |      |            |        |

|                                           |      |            |       |      |            |       |
|-------------------------------------------|------|------------|-------|------|------------|-------|
| Low (<10%)                                | Ref  | Ref        | Ref   | Ref  | Ref        | Ref   |
| Mid (10%-25%)                             | 1.15 | 1.03, 1.29 | 0.012 | 1.19 | 1.05, 1.36 | 0.008 |
| High (>25%)                               | 1.21 | 1.03, 1.42 | 0.022 | 1.20 | 0.99, 1.45 | 0.061 |
| <b>Hospital census comparison to 2019</b> |      |            |       |      |            |       |
| Equal (>-10%-<10%)                        | Ref  | Ref        | Ref   | Ref  | Ref        | Ref   |
| Less (<-10%)                              | 0.88 | 0.75, 1.05 | 0.2   | 0.92 | 0.75, 1.13 | 0.4   |
| More (>10%)                               | 1.05 | 0.94, 1.17 | 0.4   | 1.14 | 1.00, 1.31 | 0.044 |
